# Supplementary material for: Methyl‐CpG‐Binding PCR of Bloodspots for Confirmation of Fragile X Syndrome in Males
Source: Hindawi journal article supplement (doi:10.1155/2009/643692), 2009-01-01
Supplement: f1 [file 643692.f1.pdf]

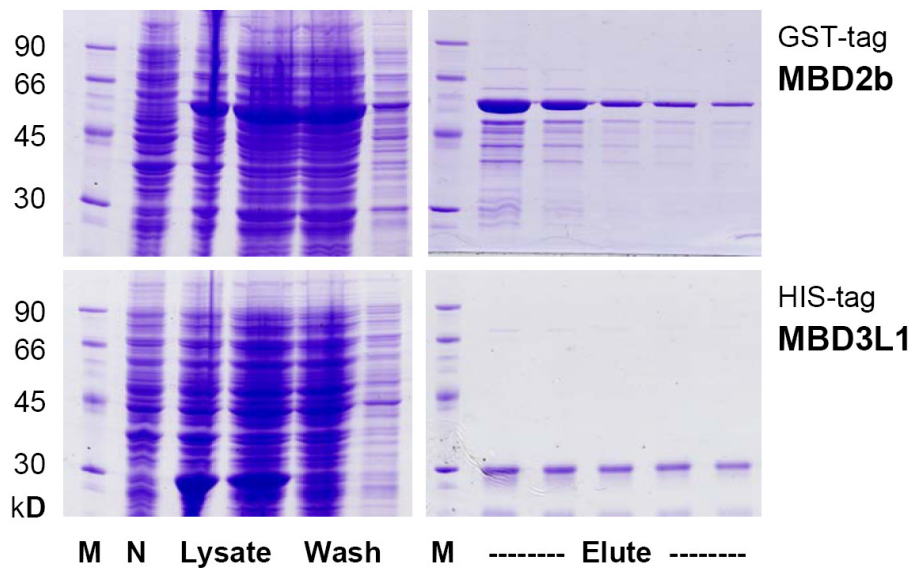

**Supplement.** Expression and purification of the GST-tagged MBD2b and HIS-tagged MBD3L1 proteins were run on a 12.5% SDS-PAGE gel and stained with Coomassie blue. M, size marker; N, before IPTG induction; Lysate, cell lysates after induction

## Supplement
